# Supplementary material for: A sensor-agnostic albedo retrieval method for realistic sea ice surfaces: model and validation
Source: Copernicus journal article supplement (doi:10.5194/tc-17-1053-2023), 2023-03-03
Supplement: Supplementary file 1 [file tc-17-1053-2023-supplement.zip]

Archive with 2 entries (2 files):
- MOD021KM.A2017175~176-Retrieval.gif
- tc-17-1053-2023-supplement-title-page.pdf
