# Supplementary material for: A sensor-agnostic albedo retrieval method for realistic sea ice surfaces: model and validation
Source: Copernicus journal article supplement (doi:10.5194/tc-17-1053-2023), 2023-03-03
Supplement: Supplementary file 1 [file tc-17-1053-2023-supplement.zip › tc-17-1053-2023-supplement-title-page.pdf]

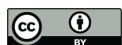

*Supplement of*

## **A sensor-agnostic albedo retrieval method for realistic sea ice surfaces: model and validation**

**Yingzhen Zhou et al.**

*Correspondence to:* Yingzhen Zhou (yzhou64@stevens.edu)

- tc-17-1053-2023-supplement-title-page.pdf
- MOD021KM.A2017175 176-Retrieval.gif

The copyright of individual parts of the supplement might differ from the article licence.
