# Supplementary figures and images for: A sensor-agnostic albedo retrieval method for realistic sea ice surfaces: model and validation
Source: Copernicus journal article supplement (doi:10.5194/tc-17-1053-2023), 2023-03-03

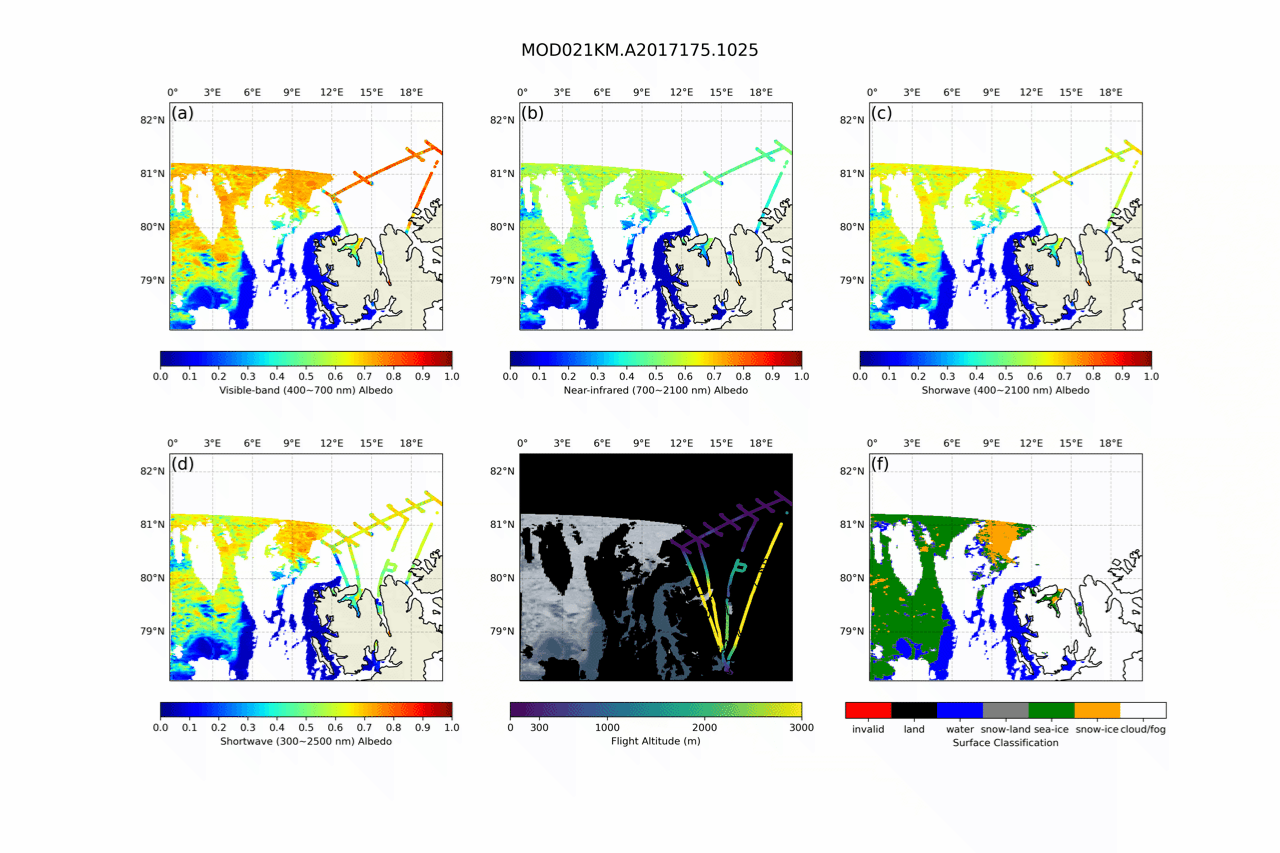

Supplement: Supplementary file 1 [file tc-17-1053-2023-supplement.zip › MOD021KM.A2017175~176-Retrieval.gif]
